# Supplementary figures and images for: Melatonin Action in Type 2 Diabetic Parotid Gland and Dental Pulp: In Vitro and Bioinformatic Findings
Source: MDPI journal article supplement (doi:10.3390/ijerph20186727), 2023-09-07

Figure S1 HUMAN PAROTID GLAND CELLS

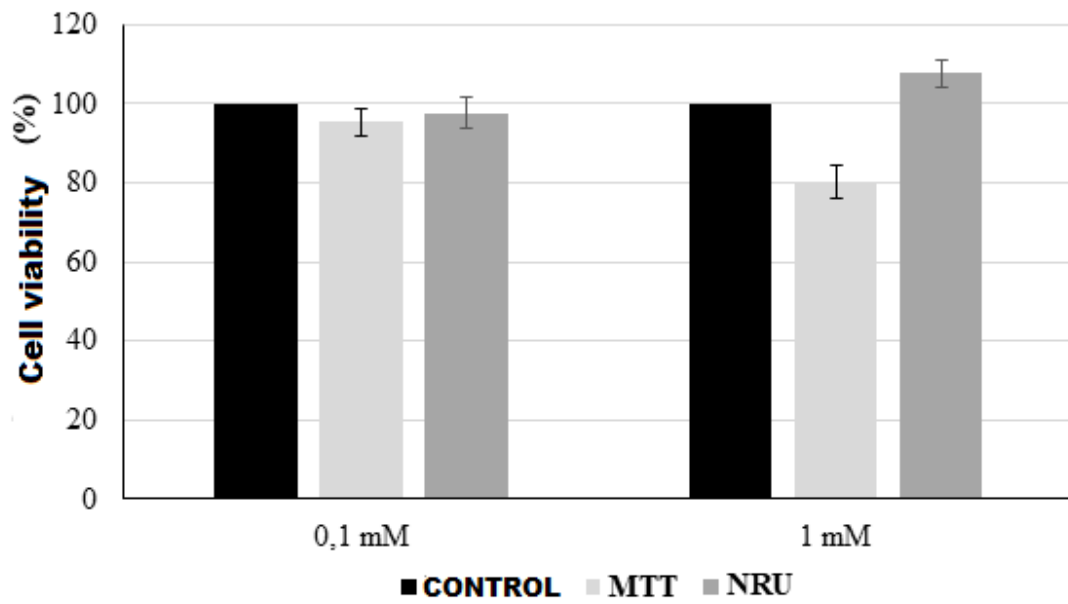

Figure S2 HUMAN DENTAL PULP CELLS

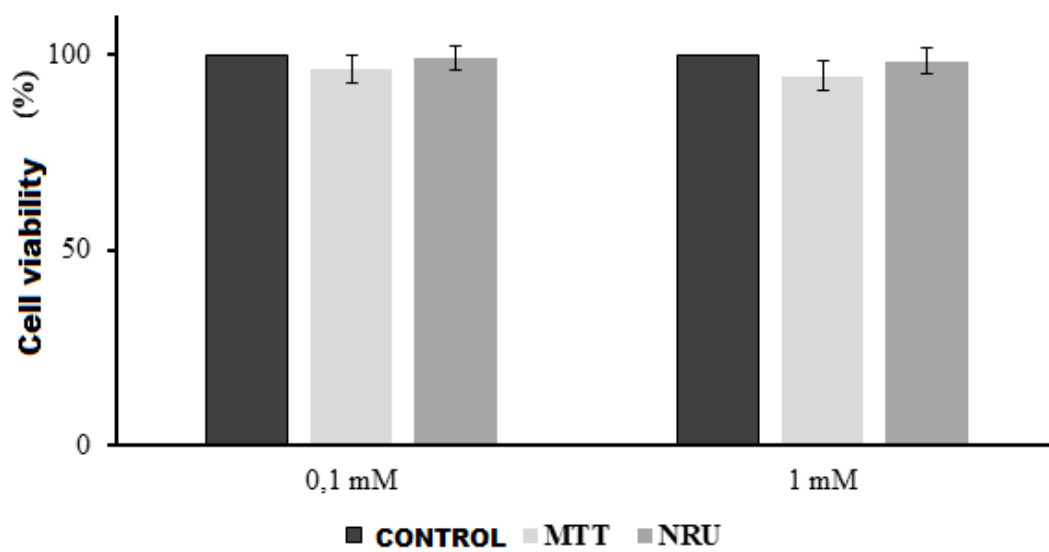

Supplement: s1 [file s1]
